# Supplementary material for: Optimizing Agronomic, Environmental, Health and Economic Performances in Summer Maize Production through Fertilizer Nitrogen Management Strategies
Source: MDPI journal article supplement (doi:10.3390/plants12071490), 2023-03-29
Supplement: s1 [file s1]

# **Optimizing agronomic, environmental, health and economic performances in summer maize production through fertilizer nitrogen management strategies**

This Supporting Information file has 9 pages including Fig. S1-S2 and Tables S1-S6.

**Table S1. Changes in the agricultural inputs and optimal N management practices during 2008-2019.**

| Input                         | Unit                            | 2008-2011                               | 2012-2019                              |
|-------------------------------|---------------------------------|-----------------------------------------|----------------------------------------|
| P <sub>2</sub> O <sub>5</sub> | kg ha <sup>-1</sup>             | 45                                      | 45                                     |
| K <sub>2</sub> O              | kg ha <sup>-1</sup>             | 90                                      | 90                                     |
| Density                       | plants ha <sup>-1</sup>         | 75000                                   | 90000                                  |
| Seeding date                  | /                               | June 10 <sup>th</sup> -30 <sup>th</sup> | June 5 <sup>th</sup> -10 <sup>th</sup> |
| Pesticides                    | kg ha <sup>-1</sup>             | 4.1                                     | 3.8                                    |
| Diesel                        | kg ha <sup>-1</sup>             | 46                                      | 46                                     |
| Irrigation water              | m <sup>3</sup> ha <sup>-1</sup> | 863                                     | 1081                                   |
| Electricity                   | kW h ha <sup>-1</sup>           | 574                                     | 719                                    |
| N target values               |                                 |                                         |                                        |
|                               | kg ha <sup>-1</sup>             | V6-10 stage, 120                        | V6-R1 stage, 185                       |
|                               | kg ha <sup>-1</sup>             | V10-R6 stage, 190                       | R1-R6 stage, 165                       |

**Table S2. N fertilizer application rate (kg N ha<sup>-1</sup>) under five N treatments during 2008-2019.**

|             | CK | Opt. N*50-70% | Opt. N | Opt. N*130-150% | Con. N |
|-------------|----|---------------|--------|-----------------|--------|
| 2008        | 0  | 120           | 240    | 360             | 250    |
| 2009        | 0  | 75            | 150    | 225             | 250    |
| 2010        | 0  | 74            | 105    | 137             | 250    |
| 2011        | 0  | 135           | 193    | 251             | 250    |
| 2012        | 0  | 120           | 172    | 224             | 250    |
| 2013        | 0  | 114           | 163    | 212             | 250    |
| 2014        | 0  | 122           | 174    | 226             | 250    |
| 2015        | 0  | 102           | 145    | 189             | 250    |
| 2016        | 0  | 139           | 199    | 259             | 250    |
| 2017        | 0  | 119           | 170    | 221             | 250    |
| 2018        | 0  | 74            | 105    | 137             | 250    |
| 2019        | 0  | 74            | 105    | 137             | 250    |
| Mean N rate | 0  | 106           | 160    | 215             | 250    |

CK, no N; Opt. N\*50-70%, 50-70% of optimal N rate; Opt. N, optimal N rate; Opt.

N\*130-150%, 130-150% of optimal N rate; Con. N, conventional N rate.

**Table S3.** Factors and equations for emissions estimation from the application of fertilizer.

| Emissions items                                   | Emissions factors or equations  | Required information                              | References               |
|---------------------------------------------------|---------------------------------|---------------------------------------------------|--------------------------|
| NH <sub>3</sub> -N                                | N rate                          | $7.98 + 0.099 \times N_{\text{rate}}$             | Cui et al., 2018         |
| NO <sub>3</sub> -N                                | N rate                          | $10.7 \times \exp(0.0060 \times N_{\text{rate}})$ | Cui et al., 2018         |
| Direct N <sub>2</sub> O-N                         |                                 |                                                   |                          |
| Opt. N*50-70%                                     | N rate                          | 0.93%                                             | Song et al., 2018        |
| Opt. N                                            | N rate                          | 0.85%                                             | Song et al., 2018        |
| Opt. N*130-150%                                   | N rate                          | 0.97%                                             | Song et al., 2018        |
| Con. N                                            | N rate                          | 1.29%                                             | Song et al., 2018        |
| Indirect N <sub>2</sub> O from NH <sub>3</sub> -N | Quantity of NH <sub>3</sub> -N  | 1.00%                                             | IPCC, 2006               |
| Indirect N <sub>2</sub> O from NO <sub>3</sub> -N | Quantity of NO <sub>3</sub> -N  | 0.75%                                             | IPCC, 2006               |
| NOx-N                                             | Total N <sub>2</sub> O quantity | 10.00%                                            | Brenttrup et al., 2004   |
| PO <sub>4</sub> -P                                | Total P quantity                | 1.00%                                             | Gaynor and Findlay, 1995 |

**Table S4.** Two-way analysis of variance of the nitrogen (N) treatments with year (Y) interactions on tested parameters of summer maize grown with varied levels of N application under field condition. \*\*\*, \*\* and \* indicate significant difference at  $P < 0.001$ , 0.01, 0.05 levels, respectively, and ns indicate no significant difference.

| Source of variation | Grain yield | Grain protein yield | Acidification potential | Eutrophication potential | Global warming potential | Nergy depletion potential | Human health effects |
|---------------------|-------------|---------------------|-------------------------|--------------------------|--------------------------|---------------------------|----------------------|
| Nitrogen (N)        | ***         | ***                 | ***                     | ***                      | ***                      | **                        | ***                  |
| Year (Y)            | **          | **                  | **                      | **                       | *                        | *                         | **                   |
| N×Y                 | *           | **                  | *                       | *                        | *                        | ns                        | *                    |

**Table S5.** Average grain yield, grain protein concentration, and grain protein concentration in summer maize production system under five N treatments during 2008-2011 and 2012-2019

| N treatment     | Grain yield (Mg ha <sup>-1</sup> ) |           | Grain protein concentration (%) |           | Grain protein yield (kg ha <sup>-1</sup> ) |           |
|-----------------|------------------------------------|-----------|---------------------------------|-----------|--------------------------------------------|-----------|
|                 | 2008-2011                          | 2012-2019 | 2008-2011                       | 2012-2019 | 2008-2011                                  | 2012-2019 |
| CK              | 6.4 c                              | 6.2 c     | 7.13 c                          | 5.74 d    | 389 c                                      | 295 d     |
| Opt. N*50-70%   | 8.9 ab                             | 11.0 b    | 7.59 b                          | 7.36 c    | 566 b                                      | 721 c     |
| Opt. N          | 9.4 a                              | 11.3 ab   | 8.36 a                          | 7.94 ab   | 658 a                                      | 860 a     |
| Opt. N*130-150% | 8.8 b                              | 11.5 a    | 8.68 a                          | 8.09 a    | 639 a                                      | 874 a     |
| Con.N           | 9.1 ab                             | 11.3 ab   | 8.38 a                          | 7.79 b    | 640 a                                      | 821 b     |

CK, no N; Opt. N\*50-70%, 50-70% of optimal N rate; Opt. N, optimal N rate; Opt. N\*130-150%, 130-150% of optimal N rate; Con. N, conventional N rate. Means in a row followed by the same letter are not significantly at  $P<0.05$  according to LSD.

**Table S6. The comparison of environmental impacts in maize production system in North China Plain and other countries (as determined by a literature search).**

| Country or region     | N rate<br>(kg N ha <sup>-1</sup> ) | Grain yield<br>(Mg ha <sup>-1</sup> ) | Global warming potential<br>(kg CO <sub>2</sub> eq Mg <sub>-1</sub> ) | Acidification potential<br>(kg SO <sub>2</sub> eq Mg <sub>-1</sub> ) | Eutrophication potential<br>(kg PO <sub>4</sub> eq Mg <sub>-1</sub> ) | Energy depletion potential<br>(kg PO <sub>4</sub> eq Mg <sup>-1</sup> ) | References                     |
|-----------------------|------------------------------------|---------------------------------------|-----------------------------------------------------------------------|----------------------------------------------------------------------|-----------------------------------------------------------------------|-------------------------------------------------------------------------|--------------------------------|
| NCP-Quzhou            | 160                                | 10.6                                  | 304                                                                   | 6.5                                                                  | 2.9                                                                   | 2.0                                                                     | Opt. N treatment in this study |
| USA typical Corn Belt | 110-181                            | 6.3-9.1                               | 254-825                                                               | 2.7-7.8                                                              | 0.7-2.3                                                               | 2.1-3.1                                                                 | Kim et al. (2009)              |
| Poland                | 140                                | 8.9                                   | 850                                                                   | 3.0                                                                  | 1.4                                                                   | 5.6                                                                     | Król-Badziak et al. (2021)     |
| NCP-Huantai           | 262                                | 7.7                                   | 394                                                                   | 4.9                                                                  | 4.0                                                                   | 3.8                                                                     | Wang et al. (2007)             |
| NCP-Huantai           | 254                                | 7.5                                   | 1230                                                                  | 19.9                                                                 | 4.4                                                                   | 5.2                                                                     | Liang et al. (2019)            |
| NCP-Luancheng         | 181                                | 8.7                                   | 443                                                                   | 13.9                                                                 | 4.1                                                                   | 3.5                                                                     | Liang et al. (2018)            |
| NCP-Quzhou            | 182                                | 9.1                                   | 487                                                                   | 11.4                                                                 | 2.3                                                                   | 2.3                                                                     | Wang et al. (2014)             |

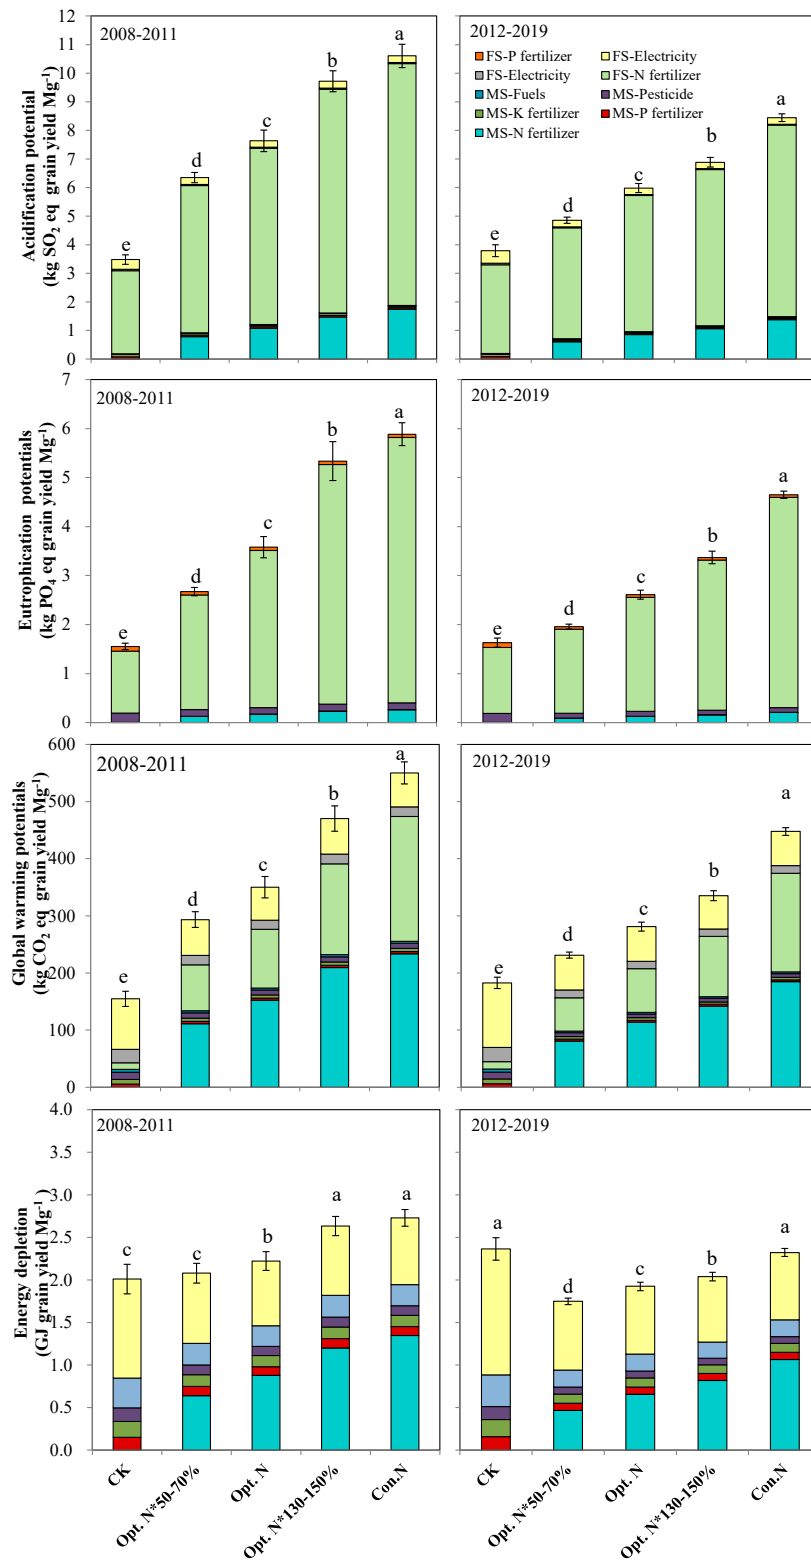

**Fig. S1.** Life-cycle acidification, eutrophication, global warming, and energy depletion potential per Mg of maize grain produced under five N treatments during the years 2008-2011

and 2012-2019 of the experiment. CK, no N; Opt. N\*50-70%, 50-70% of optimal N rate; Opt. N, optimal N rate; Opt. N\*130-150%, 130-150% of optimal N rate; Con. N, conventional N rate. MS, agricultural materials system; FS, arable farming system. Values are means + SE. In each panel, means followed by the same letter are not significantly at  $P < 0.05$  according to LSD.



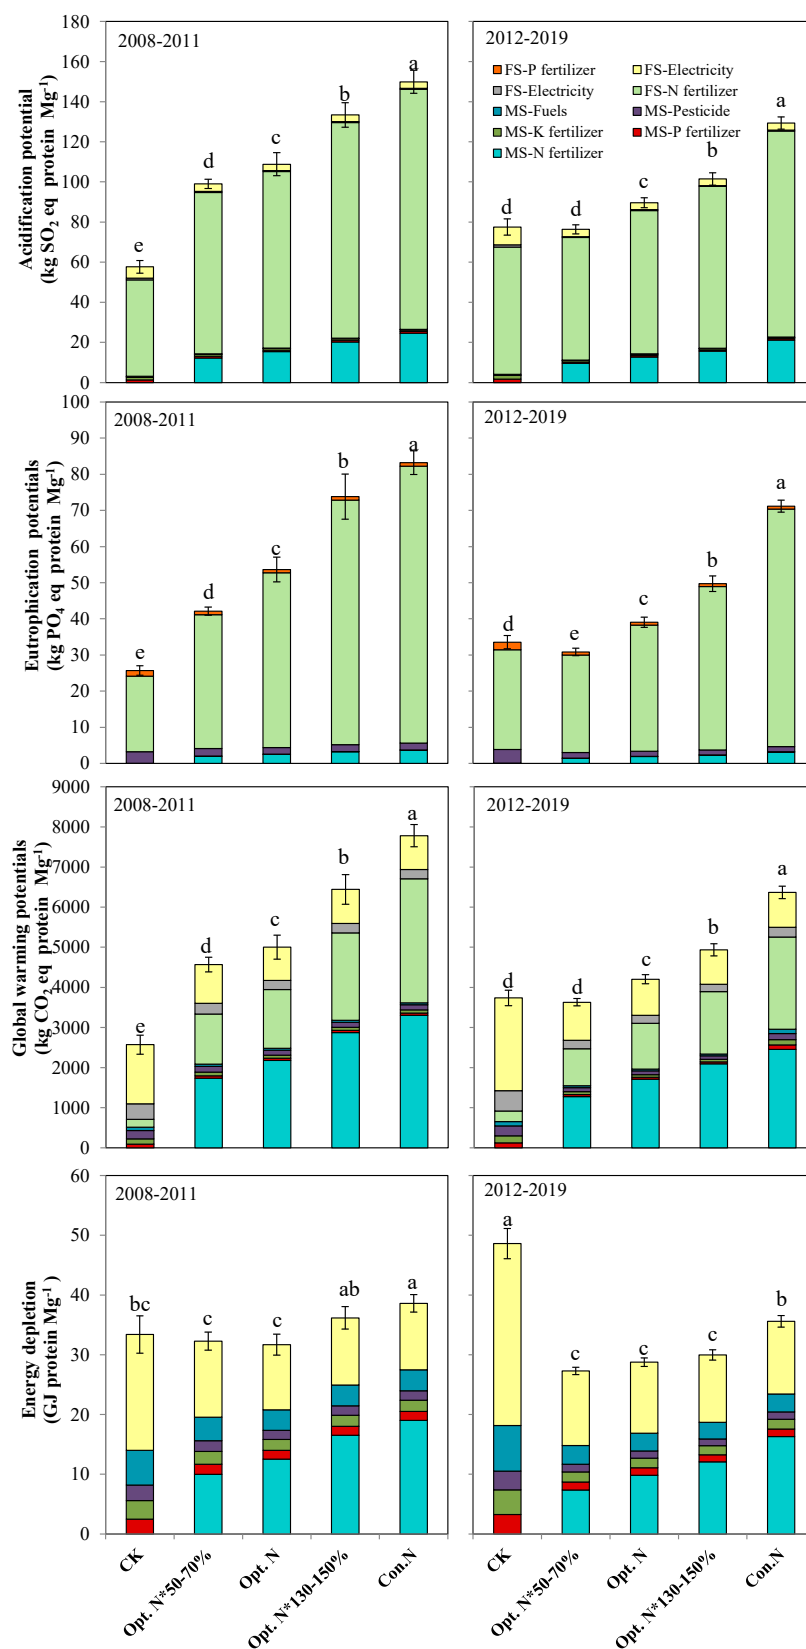

**Fig. S2.** Life-cycle acidification, eutrophication, global warming, and energy depletion potential per Mg of maize grain protein produced under five N treatments during the years

2008-2011 and 2012-2019 of the experiment. Values are means + SE. CK, no N; Opt. N\*50-70%, 50-70% of optimal N rate; Opt. N, optimal N rate; Opt. N\*130-150%, 130-150% of optimal N rate; Con. N, conventional N rate. MS, agricultural materials system; FS, arable farming system. In each panel, means followed by the same letter are not significantly at  $P<0.05$  according to LSD.
